# Supplementary material
Source: Springer Nature journal article supplement (https://www.springermedizin.de/resource/supplementary/12916_2013_893_MOESM7_ESM.pdf/9598564)

**A***Hif1 $\alpha$* 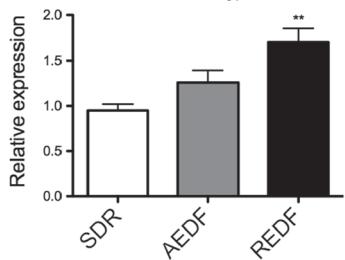*Hif2 $\alpha$* 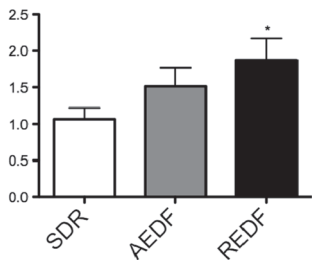*Adm*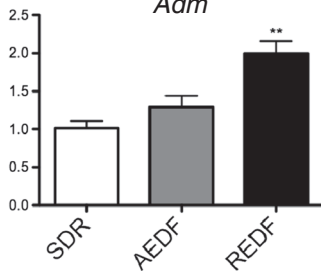*LdhA*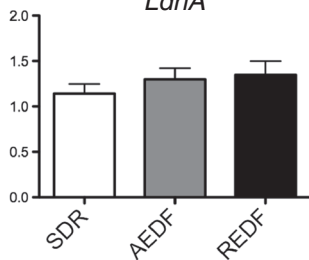**B***Hif1 $\alpha$* 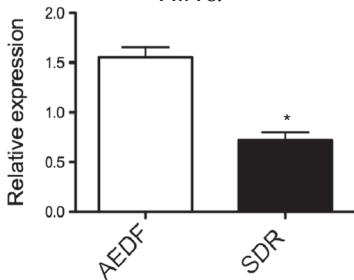**C***Hif1 $\alpha$* 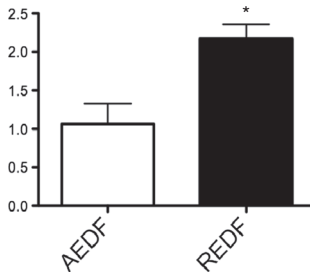

Supplement: MOESM7 [file 9598564]
